# Supplementary material
Source: PubMed Central journal article supplement (PMC8020684)
Supplement: jcsm.9008.ds001.pdf [file jcsm.9008.ds001.pdf]

**TABLE S1** Therapy variables over the first 90 days of positive airway pressure, by country

| Adherence variables (in first 90 days)          | Brazil (n=31,672)   | Mexico (n=16,934)   | US (n=4,132,884)    | p-value             |
|-------------------------------------------------|---------------------|---------------------|---------------------|---------------------|
| Average AHI <sup>1</sup> , /h                   |                     |                     |                     |                     |
| Mean ± SD                                       | 3.44 ± 4.50         | 3.20 ± 5.31         | 3.24 ± 4.59         | <0.001 <sup>2</sup> |
| Median (IQR)                                    | 2.09 (1.09, 3.99)   | 1.59 (0.76, 3.40)   | 1.86 (0.95, 3.68)   | <0.001 <sup>3</sup> |
| Average OAI <sup>1</sup> , /h                   |                     |                     |                     |                     |
| Mean ± SD                                       | 1.62 ± 2.67         | 1.40 ± 3.15         | 1.24 ± 2.25         | <0.001 <sup>2</sup> |
| Median (IQR)                                    | 0.85 (0.36, 1.84)   | 0.58 (0.22, 1.43)   | 0.62 (0.25, 1.38)   | <0.001 <sup>3</sup> |
| Average median leak, L/min                      |                     |                     |                     |                     |
| Mean ± SD                                       | 5.09 ± 7.16         | 4.99 ± 8.67         | 7.09 ± 11.09        | <0.001 <sup>2</sup> |
| Median (IQR)                                    | 2.66 (0.59, 6.88)   | 1.82 (0.24, 6.27)   | 3.60 (0.92, 8.70)   | <0.001 <sup>3</sup> |
| Average 95 <sup>th</sup> percentile leak, L/min |                     |                     |                     |                     |
| Mean ± SD                                       | 18.63 ± 14.54       | 18.45 ± 16.38       | 23.07 ± 19.79       | <0.001 <sup>2</sup> |
| Median (IQR)                                    | 15.54 (8.30, 25.31) | 14.52 (6.64, 25.44) | 17.97 (9.40, 30.30) | <0.001 <sup>3</sup> |

<sup>1</sup>Average calculated based on sessions with usage ≥1 hour; <sup>2</sup>Analysis of variance (ANOVA) test. <sup>3</sup>Kruskal-Wallis test; AHI, apnea-hypopnea index; OAI, obstructive apnea index.

**FIGURE S1** Age distribution of patients by country

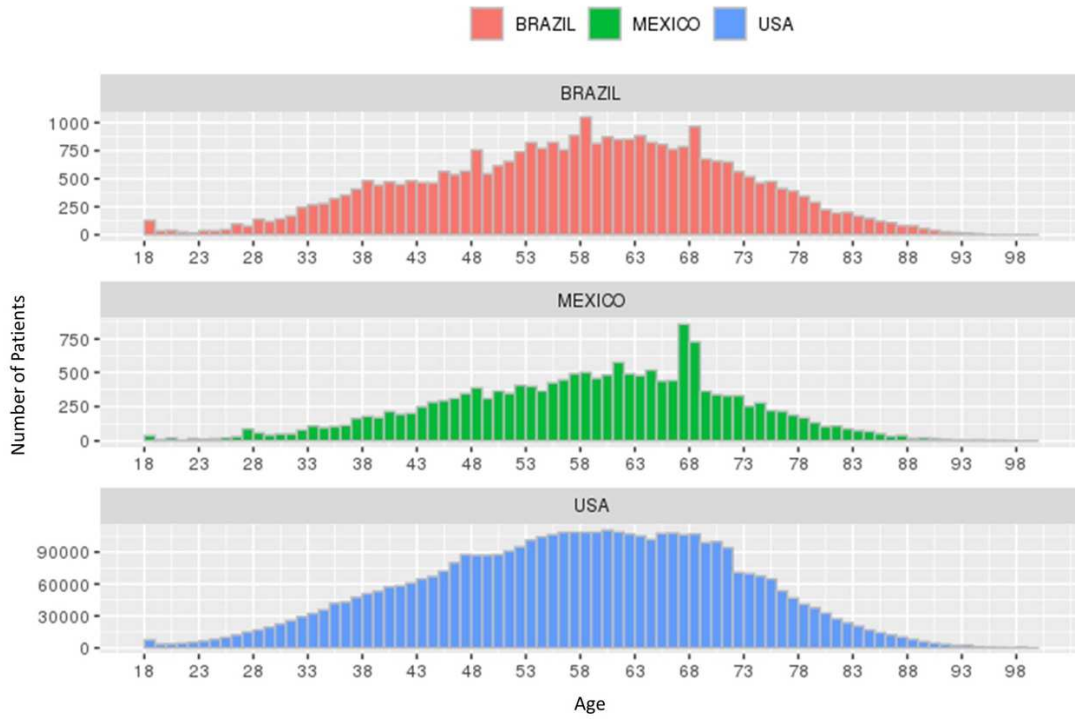

**FIGURE S2** Centers for Medicare and Medicaid (CMS) adherence rates in different age groups

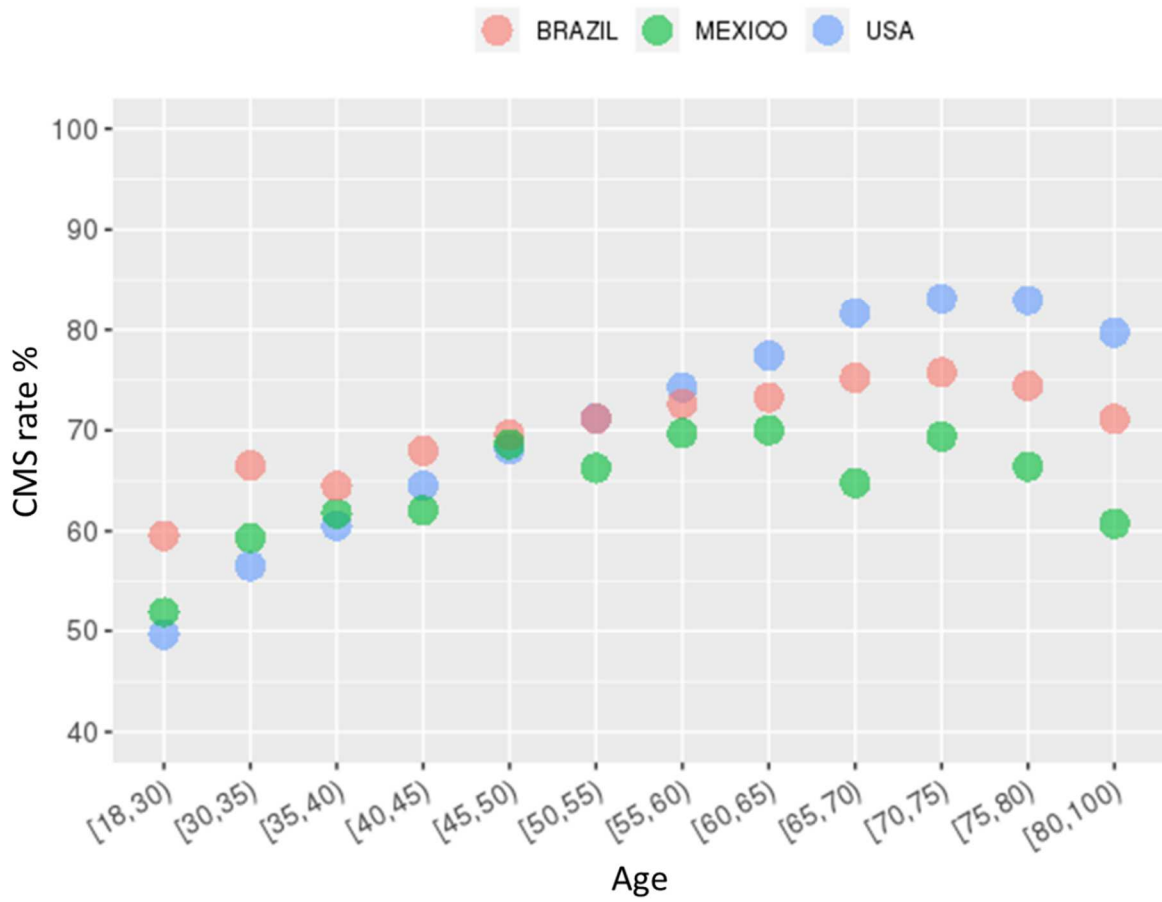

**FIGURE S3** Univariate analysis showing the effect of age on Centers for Medicare and Medicaid (CMS) adherence rates in different

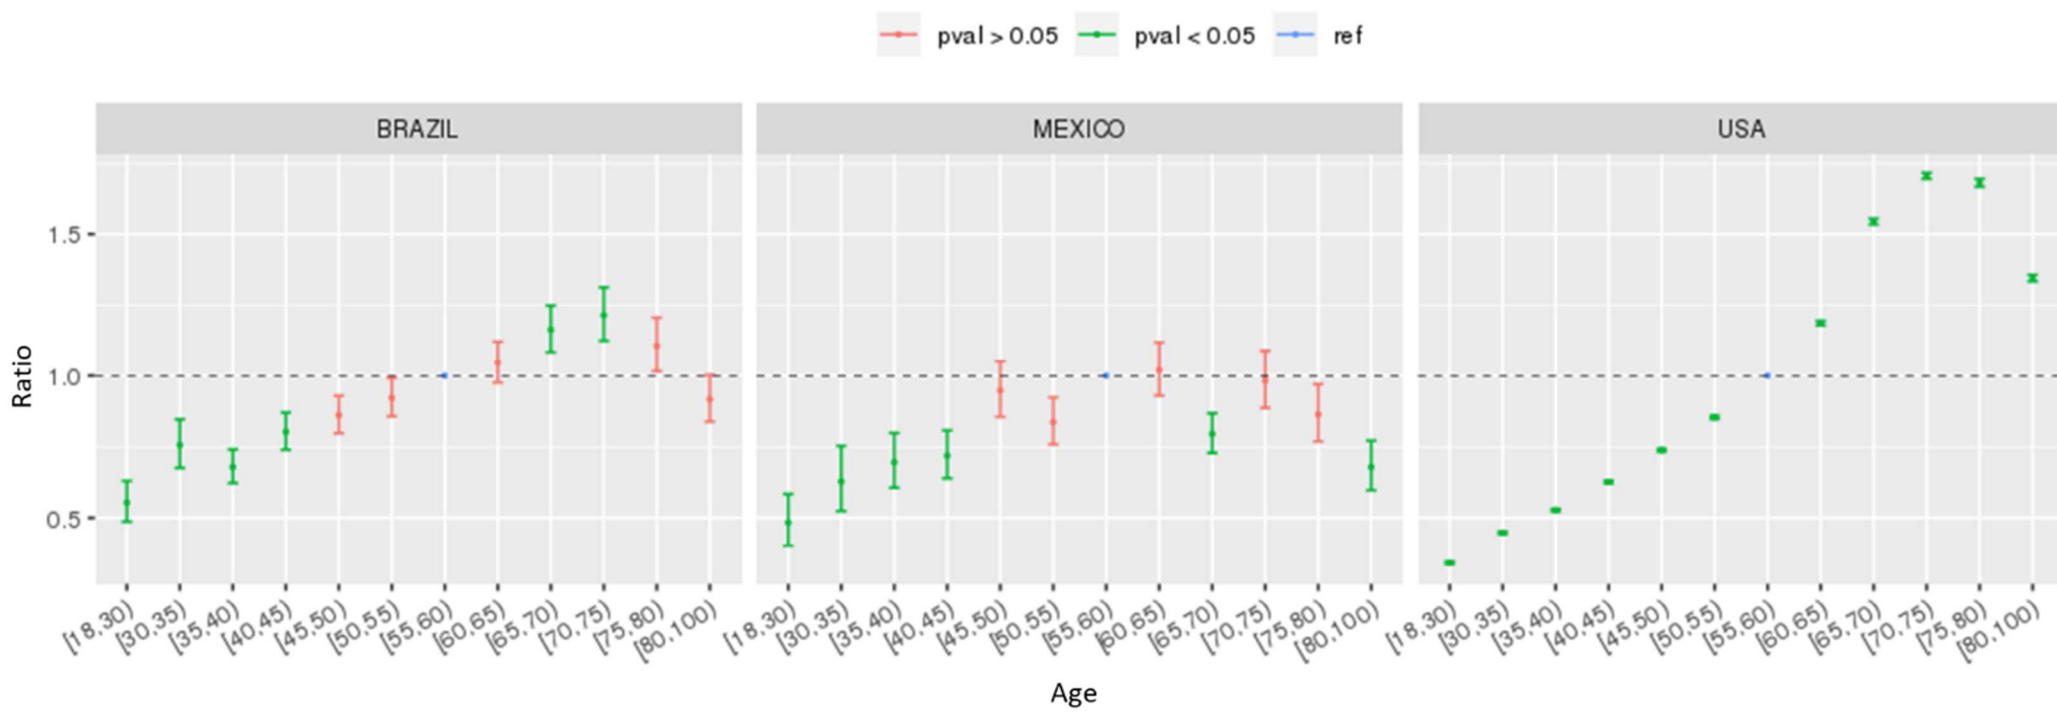

age groups
